# Supplementary material for: Water-dispersible polyphosphate-grafted Fe3O4 nanomagnets for cancer therapy
Source: Royal Society of Chemistry journal article supplement (doi:10.1039/c5ra16343a), 2015-01-01
Supplement: c5ra16343a1.pdf [file c5ra16343a1.pdf]

## Electronic Supplementary Information (ESI†)

### Water-dispersible Polyphosphate Grafted $\text{Fe}_3\text{O}_4$ Nanomagnets for Cancer Therapy

Jerina Majeed<sup>a</sup>, K. C. Barick<sup>a,\*</sup>, Neena G. Shetake<sup>b</sup>, B. N. Pandey<sup>b</sup>, P. A. Hassan<sup>a,\*</sup>, A. K. Tyagi<sup>a,\*</sup>

<sup>a</sup>Chemistry Division, Bhabha Atomic Research Centre, Mumbai – 400085, India

<sup>b</sup>Radiation Biology and Health Sciences Division, Bhabha Atomic Research Centre, Mumbai – 400085, India

\*Corresponding authors: [kcbarick@barc.gov.in](mailto:kcbarick@barc.gov.in), [hassan@barc.gov.in](mailto:hassan@barc.gov.in), [aktyagi@barc.gov.in](mailto:aktyagi@barc.gov.in)

Fax: + 91 22 2550 5151; Tel: + 91 22 2559 0284

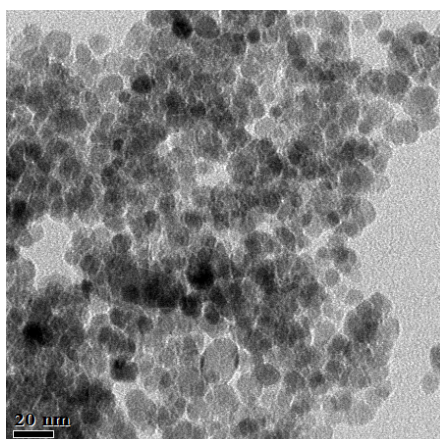

Fig. S1. TEM image of bare MNP.

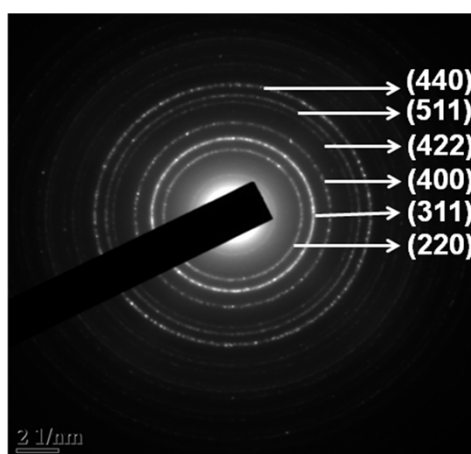

Fig. S2. A typical selected area electron diffraction pattern of PPNM.

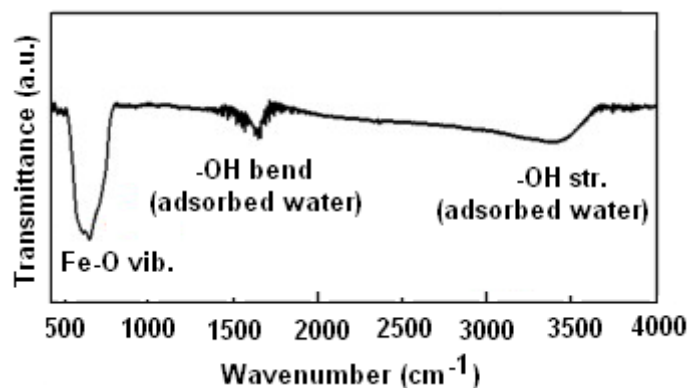

Fig. S3. FTIR spectrum of bare Fe<sub>3</sub>O<sub>4</sub> nanoparticles. The –OH bending and stretching modes are observed in FTIR spectrum of bare Fe<sub>3</sub>O<sub>4</sub> nanoparticles is due to the adsorption of water molecules on their surface.

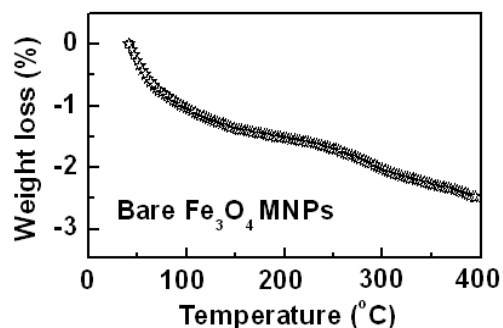

Fig. S4. TGA plot of bare Fe<sub>3</sub>O<sub>4</sub> nanoparticles (TGA plot shows a total weight loss of about 2.5% over the temperature range from 40 to 400 °C. This might be due to the loss of residual water and absorbed hydroxyl groups on the surface of Fe<sub>3</sub>O<sub>4</sub> nanoparticles due to aqueous media synthesis).

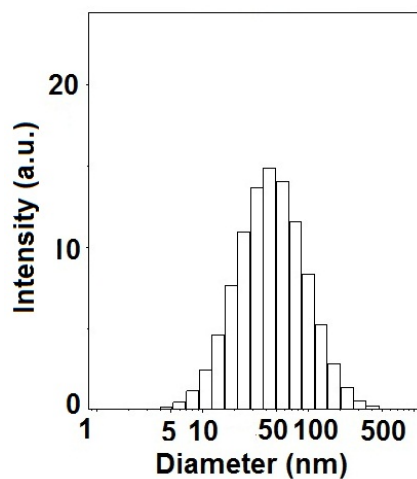

Fig. S5. DLS plot of aqueous suspension of PPNM showing mean hydrodynamic diameter of 43 nm).

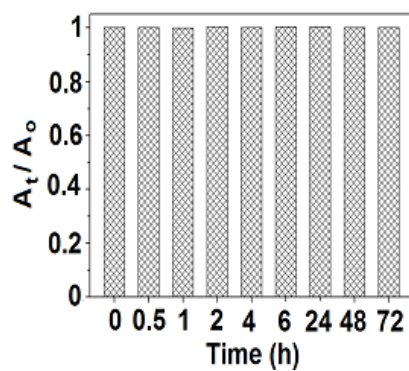

Fig. S6. Normalized UV absorbance ( $A_t/A_0$ ) vs. time plot of PPNM (0.05 mg/ml) at wavelength of 350 nm in aqueous ( $A_t$  = absorbance at time 't' and  $A_0$  = Absorbance at t=0).

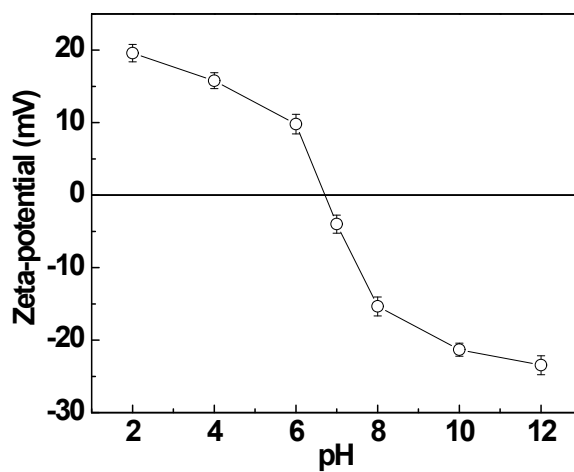

Fig. S7. pH dependent zeta-potential plot of bare  $\text{Fe}_3\text{O}_4$  nanoparticles.

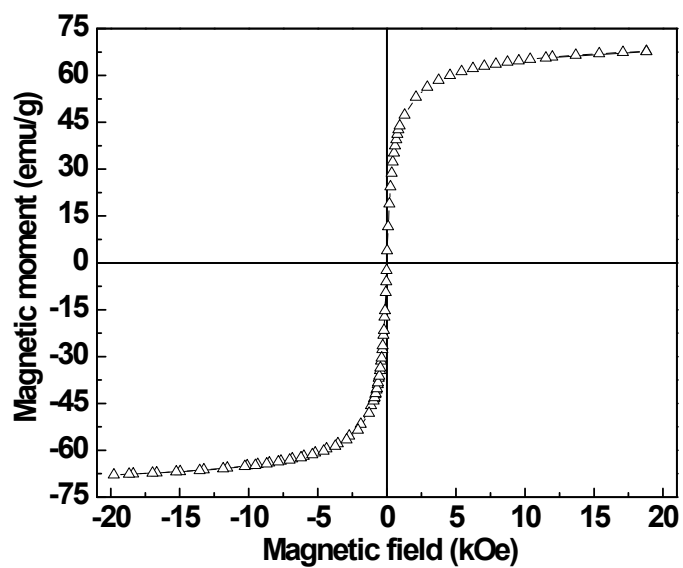

Fig. S8. Field dependent magnetization plot of bare MNP at 300 K.

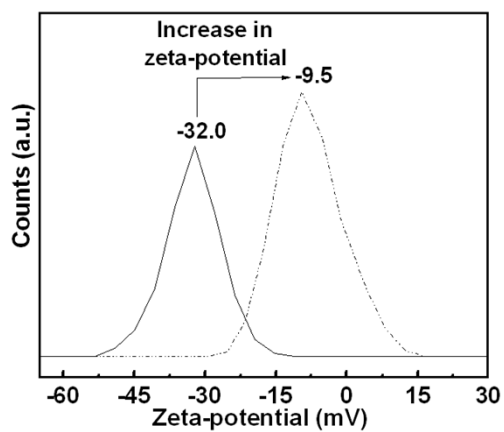

Fig. S9. Zeta-potential of 1 ml of PPNM (100  $\mu\text{g}$ ) and DOX-PPNM (100  $\mu\text{g}$  PPNM interacting with 10  $\mu\text{g}$  of DOX) suspensions.

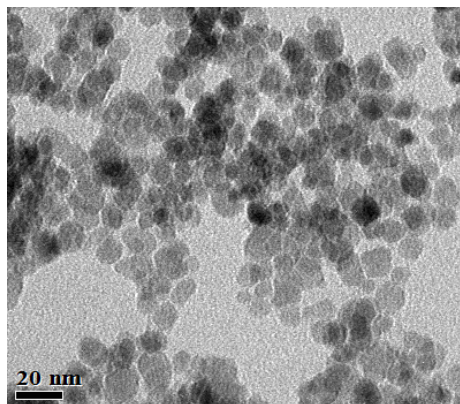

Fig. S10. TEM image of DOX loaded PPNM.

Table S1. Zeta-potential of PPNM incubated with BSA for different time.

| Sample | Zeta-potential of sample<br>in 0.01M PBS (pH 7.4) | Zeta-potential of sample incubated with BSA(0.025<br>mg/ml) in 1 ml of 0.01 PBS (pH 7.4) |       |       |       |
|--------|---------------------------------------------------|------------------------------------------------------------------------------------------|-------|-------|-------|
|        |                                                   |                                                                                          |       |       |       |
| PPMN   | -30.0                                             | -30.2                                                                                    | -30.0 | -29.9 | -29.4 |
